# Supplementary material for: Temperature sensitive hydrogels cross-linked by magnetic LAPONITE® RD®: effects of particle magnetization
Source: Royal Society of Chemistry journal article supplement (doi:10.1039/d0ma00687d), 2020-01-01
Supplement: d0ma00687d1.pdf [file d0ma00687d1.pdf]

ARTICLE

## Supplementary materials

Received 00th January 20xx,  
Accepted 00th January 20xx

DOI: 10.1039/x0xx00000x

## Temperature sensitive hydrogels cross-linked by magnetic Laponite RD®: Effects of particle magnetization

Nikolai I. Lebovka,<sup>\*a</sup> Yurii M. Samchenko, Liudmyla O. Kernosenko, Tatiana P. Poltoratska, Natalia O. Pasmurtseva, Igor E. Mamyshev, Vladimir A. Gigiberiya

The work discusses the synthesis and the properties of magnetite modified Laponite® RD platelets (Lap). Magnetized Lap (mLap) nanoparticles were synthesized by a co-precipitation method with different weight ratios  $X = \text{Fe}_3\text{O}_4/\text{Lap}$  ( $=0-2$ ). For characterization of the samples the particle size distributions and sedimentation behavior in an external magnetic field were studied. The temperature sensitive hydrogels on the base of N-isopropylacrylamide) cross-linked by mLap were synthesized. An increased aggregation of mLap particles in aqueous suspensions has been revealed, but all the systems demonstrated high sedimentation stability. Significant effects of value of  $X$  on rate of sedimentation mLap particles in magnetic fields and on the swelling ability of hydrogels have been revealed. For example at  $X=2$  the increase in swelling by  $\approx 2.7$  was observed as compared with swelling for hydrogels based on pure Lap.

---

<sup>a</sup> *Institute of Biocolloidal Chemistry named after F. D. Ovcharenko, NAS of Ukraine, 42, blvr. Vernadskogo, Kyiv 03142, Ukraine. E-mail: lebovka@gmail.com*

† Footnotes relating to the title and/or authors should appear here.  
Electronic Supplementary Information (ESI) available: Experimental section and supplementary figures. See DOI: 10.1039/x0xx00000x

## Structural formulas of some chemicals

Iron(II) sulfate heptahydrate  $\text{FeSO}_4 \cdot 7\text{H}_2\text{O}$  (Merck, 99%), iron(III) chloride  $\text{FeCl}_3$  (Merck, 98%), ammonium  $\text{NH}_3 \cdot \text{H}_2\text{O}$  (Merck, 25%), tetrasodium pyrophosphate  $\text{Na}_4\text{P}_2\text{O}_7$  (TSPP, Merck, 95%), ammonium persulfate  $(\text{NH}_4)_2\text{S}_2\text{O}_8$ , (APS, Sigma, 98%), N,N,N',N'-tetramethylethylenediamine, (TEMED, Merck, 99%), tetrasodium pyrophosphate (TSPP, Merck) were used

as received without further purification. N-isopropylacrylamide, NIPAAm, (Sigma-Aldrich, 97%) was recrystallized from hexane and dried under vacuum. Structural formulas of some chemicals used this paper are presented in Table S1.

Table S1. Structural formulas of some chemicals

| Formula                                                                                                                                                                | Name and short description                                                                                                                                                                                                                                                                                                                                |
|------------------------------------------------------------------------------------------------------------------------------------------------------------------------|-----------------------------------------------------------------------------------------------------------------------------------------------------------------------------------------------------------------------------------------------------------------------------------------------------------------------------------------------------------|
| 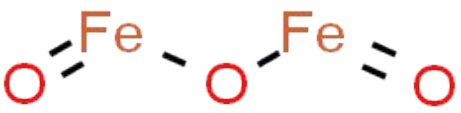<br> | <p>Magnetite, <math>\text{Fe}_3\text{O}_4</math> (<math>\text{FeO} \cdot \text{Fe}_2\text{O}_3</math>) Iron (II, III) oxide structure<br/> Molar mass: 231.533 g/mol<br/> Density: 5.17 g/cm<sup>3</sup><br/> Melting point: 1597 °C</p>                                                                                                                  |
|                                                                                       | <p>N-isopropylacrylamide (NIPAAm) is a monomer for polymerization. It forms a hydrogel when cross-linked with N,N'-methylene-bis-acrylamide (MBAm) or N,N'-cystamine-bis-acrylamide (CBAm). It expels its liquid contents at a temperature near 32°C.<br/> Density: 1.1 g/cm<sup>3</sup><br/> Melting point 96 °C</p>                                     |
|                                                                                     | <p>Ammonium persulfate <math>(\text{NH}_4)_2\text{S}_2\text{O}_8</math> (APS) is an oxidizing agent and a radical initiators in the polymerization of AA. It is used in polymer chemistry, as an etchant, and as a cleaning and bleaching agent.<br/> Molar mass: 228.18 g/mol<br/> Density: 1.98 g/cm<sup>3</sup></p>                                    |
|                                                                                     | <p>N,N,N',N'-tetramethylethylenediamine (TEMED) is used with APS to catalyze the polymerization of NIPAAm.<br/> Molar mass 116.208 g/mol<br/> Density 0.7765 g/cm<sup>3</sup><br/> Melting point -58.6 °C</p>                                                                                                                                             |
|                                                                                     | <p>Tetrasodium pyrophosphate (TSPP) is a buffering and dispersing agent. Common foods containing tetrasodium pyrophosphate include chicken nuggets, marshmallows. In toothpaste and dental floss, tetrasodium pyrophosphate acts as a tartar control agent.<br/> Molar mass 265.9 g/mol<br/> Density 2.534 g/cm<sup>3</sup><br/> Melting point 988 °C</p> |

## Fourier transform infrared (FTIR) spectroscopy studies on Lap, magnetite and Lap-magnetite nanocomposites

FTIR analysis was carried out using a spectrometer IR Affinity-1S (Shimadzu, Japan) using an attenuated total reflection technique (internal reflection spectroscopy) in the spectral range 400–4000  $\text{cm}^{-1}$  with a resolution of 2  $\text{cm}^{-1}$  and accumulations of 128 scans which were combined to average out random absorption artifacts. KBr pressed disk technique was used. Pellets were prepared using the standard technique under a pressure of 15  $\text{ton}/\text{cm}^2$  with a barrel 16 mm in diameter. The positions of the absorptions appearing in the spectra as shoulders were determined by second derivative.

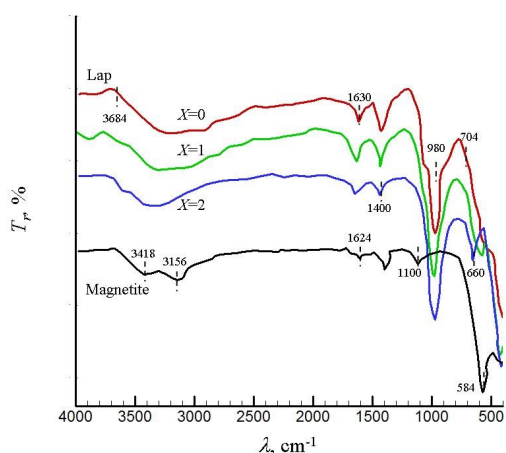

**Fig. S1.** FTIR spectra (transmission,  $T_r$ , versus wavenumbers,  $\lambda$ , of pristine Lap ( $X=0$ ), mLap ( $X=1$  and  $X=2$ ) and magnetite samples.

Figure S1 shows FTIR spectra for Lap ( $X=0$ ), mLap ( $X=1$  and  $X=2$ ) and magnetite samples. The assignment of band is presented in Table S2. The broad bands in the interval between 3000–3500  $\text{cm}^{-1}$ , and bands near 1630 and 1400  $\text{cm}^{-1}$  correspond to the OH stretching vibrations of  $\text{H}_2\text{O}$  molecules adsorbed on samples. These bands were observed for all samples. For pristine Lap sample the very characteristic is an intense band at the wavelengths between 980–1010  $\text{cm}^{-1}$  that corresponds to the Si–O and Al–O–H stretching vibrations of the tetrahedral sheets. For pure magnetite sample the intensive bands at 584  $\text{cm}^{-1}$  and 1100  $\text{cm}^{-1}$  correspond to the different vibration modes in the bond Fe–OH. In magnetized samples mLap the both bands corresponding to the Lap at  $\approx 980$   $\text{cm}^{-1}$  and magnetite at  $\approx 660$   $\text{cm}^{-1}$  were only observed at sufficiently high content of magnetite ( $X \geq 2$ ). The noticeable shift of the Fe–O vibration band of magnetite may reflect strong interactions between  $\text{Fe}_3\text{O}_4$  and Lap species in magnetized mLap samples.

**Table S2**

The assignment of the bands observed in FTIR spectra of Lap and magnetite samples.

| Position, $\text{cm}^{-1}$                                                | Assignment                                                                                                                                                                   |
|---------------------------------------------------------------------------|------------------------------------------------------------------------------------------------------------------------------------------------------------------------------|
| $\approx 3450, 1630, 1400$                                                | OH stretching vibrations of $\text{H}_2\text{O}$ molecules adsorbed on both nanoparticles and KBr used for IR measurement                                                    |
| Lap(Pálková et al. 2010)                                                  |                                                                                                                                                                              |
| 3684                                                                      | Stretching ( $\nu$ ) vibrations of $\text{Mg}_3\text{OH}$ groups                                                                                                             |
| 3645                                                                      | Valence fluctuations of surface hydroxyl groups                                                                                                                              |
| 980–1010                                                                  | Si–O stretching vibrations of the tetrahedral sheets                                                                                                                         |
| 704                                                                       | $\text{O}_b$ –Si– $\text{O}_{ap}$ bending vibration, i.e. vibration involving basal bridging oxygen's ( $\text{O}_b$ ) and apical non-bridging oxygen's ( $\text{O}_{ap}$ ). |
| Magnetite (Morales et al. 1999; Manuel et al. 2008; El-Mahdy et al. 2014) |                                                                                                                                                                              |
| 3126                                                                      | –OH vibration                                                                                                                                                                |
| 1100                                                                      | Fe–O asymmetric vibration in the bond Fe–OH.                                                                                                                                 |
| 584, 637 $\text{cm}^{-1}$                                                 | Stretching and torsional vibration modes of the Fe–O bonds of the magnetite                                                                                                  |

## Thermogravimetric analysis (TGA) of Lap, magnetite and Lap-magnetite nanocomposites

TGA and DTA studies of the samples were performed using a Q-1000 derivatograph (MOM, Hungary) equipped with a data logger.

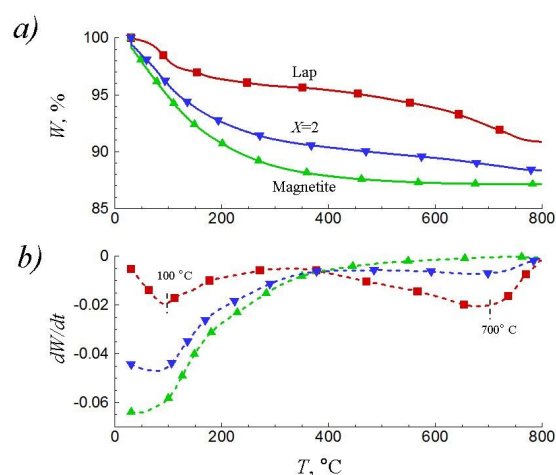

**Fig. S2.** Thermograms presented as relative weight  $W$  (a) and derivative  $dW/dT$  (b) versus the temperature  $T$  of pristine Lap ( $X=0$ ), mLap ( $X=2$ ) and magnetite samples.

The studies were carried out in the dynamic mode in air, in the temperature range of 293–1273 K, at the heating rate of 10° C/min from 25 to 800°C. Samples (40 mg) were placed in a conic platinum crucible.

Figure S2 shows TGA curves for pristine Lap ( $X=0$ ), mLap ( $X=2$ ) and magnetite samples. Pristine Lap ( $X=0$ ) demonstrated two thermal decomposition steps corresponding to the loss of adsorbed water ( $\approx 100$  °C) and the dehydroxylation of the Lap ( $\approx 700$  °C). Total weight loss of Lap at  $T=800$  °C was approximately 9 %. Observed phase-transition temperatures obtained in this study were in reasonable agreement with those reported in literature for nanoparticles of Lap (Wang et al. 2009). Hybrid sample ( $X=2$ ) also demonstrated the step related with the loss of adsorbed water. For pure magnetite mass losses observed at  $\approx 100$  °C corresponds to the removal of physically adsorbed water. The differential thermal analysis (DTA) studies also revealed exothermic peaks at  $T\approx 554$  °C attributed to phase transitions of magnetite into hematite phase (Chen 2013).

## References

- Chen Y-H (2013) Thermal properties of nanocrystalline goethite, magnetite, and maghemite. *J Alloys Compd* 553:194–198
- El-Mahdy GA, Atta AM, Al-Lohedan HA (2014) Synthesis and evaluation of poly (sodium 2-acrylamido-2-methylpropane sulfonate-co-styrene)/magnetite nanoparticle composites as corrosion inhibitors for steel. *Molecules* 19:1713–1731
- Manuel J, Kim J-K, Ahn J-H, et al (2008) Surface-modified maghemite as the cathode material for lithium batteries. *J Power Sources* 184:527–531
- Morales M d P, Veintemillas-Verdaguer S, Montero MI, et al (1999) Surface and internal spin canting in  $\gamma$ -Fe<sub>2</sub>O<sub>3</sub> nanoparticles. *Chem Mater* 11:3058–3064
- Pálková H, Madejová J, Zimowska M, Serwicka EM (2010) Laponite-derived porous clay heterostructures: II. FTIR study of the structure evolution. *Microporous Mesoporous Mater* 127:237–244
- Wang B, Zhou M, Rozynek Z, Fossum JO (2009) Electrorheological properties of organically modified nanolayered laponite: influence of intercalation, adsorption and wettability. *J Mater Chem* 19:1816–1828
